# Supplementary material for: Exploration and exploitation in the macrohistory of the pre-Hispanic Pueblo Southwest
Source: PubMed Central journal article supplement — Sci Adv. 2016 Apr 1;2(4):e1501532. doi: 10.1126/sciadv.1501532 (PMC4820384; doi:10.1126/sciadv.1501532), 2016-04-01
Supplement: 1501532_SM.pdf [file 1501532_SM.pdf]

## Supplementary Materials for

### **Exploration and exploitation in the macrohistory of the pre-Hispanic Pueblo Southwest**

R. Kyle Bocinsky, Johnathan Rush, Keith W. Kintigh, Timothy A. Kohler

Published 1 April 2016, *Sci. Adv.* **2**, e1501532 (2016)

DOI: 10.1126/sciadv.1501532

**Other Supplementary Material for this manuscript includes the following:**  
(available at [advances.sciencemag.org/cgi/content/full/2/4/e1501532/DC1](http://advances.sciencemag.org/cgi/content/full/2/4/e1501532/DC1))

- Data file S1. R code for all analyses reported here.
- Movie S1 (.mov format). Annual realization of the MFN from A.D. 500 to 1400 for the study area shown within dotted lines in Fig. 1.
